# Supplementary material for: Phase II Investigation of the Efficacy of Antimycobacterial Therapy in Chronic Pulmonary Sarcoidosis
Source: PubMed Central journal article supplement — Chest. 2020 Dec 30;159(5):1902–12. doi: 10.1016/j.chest.2020.12.027 (PMC8129732; doi:10.1016/j.chest.2020.12.027), 2020-12-30
Supplement: mmc1.pdf [file mmc1.pdf]

## Phase II Investigation of the Efficacy of Antimycobacterial Therapy in Chronic Pulmonary Sarcoidosis

*Wonder P. Drake, MD; Daniel A. Culver, DO; Robert P. Baughman, MD; Marc A. Judson, MD; Elliott D. Crouser, MD; W. Ennis James, MD; Gregory D. Ayers, MS; Tan Ding, MS; Kenny Abel, BS; Abena Green; Amy Kerrigan, RN; Ahmed Sesay, MD; and Gordon R. Bernard, MD*

CHEST 2021; 159(5):1902-1912

*Online supplements are not copyedited prior to posting and the author(s) take full responsibility for the accuracy of all data.*

© 2021 AMERICAN COLLEGE OF CHEST PHYSICIANS. Reproduction of this article is prohibited without written permission from the American College of Chest Physicians. See online for more details. DOI: 10.1016/j.chest.2020.12.027

**e-Table 1: AE Records**

|    | Institution | Study ID | Date     | Therapy Cycle   | Term                              | Relation to Study | Outcome    |
|----|-------------|----------|----------|-----------------|-----------------------------------|-------------------|------------|
| 1  | Cleveland   | 11569-1  | 1/30/15  | Week 16-24      | broken foot and fibula            | Possibly Related  | Unresolved |
| 2  | Cleveland   | 11569-2  | 10/10/14 | Week 0-4        | Fever, Nausea, Chills             | Possibly Related  | Resolved   |
| 3  | Cleveland   | 11569-2  | 10/20/14 | Week 0-4        | Fever                             | Related           | Resolved   |
| 4  | Cleveland   | 11569-3  | 11/14/14 | Week 4-8        | Surgey                            | Possibly Related  |            |
| 5  | Cleveland   | 11569-5  | 12/17/14 | Week 4-8        | Low Platelet count                | Related           | Resolved   |
| 6  | Cleveland   | 11569-5  | 12/17/14 | Week 4-8        | Low WBC Count                     | Related           | Resolved   |
| 7  | Cleveland   | 11569-8  | 1/24/15  | Week 0-4        | Shortness of breath               | Related           | Resolved   |
| 8  | Cleveland   | 11569-9  | 5/21/15  | Week 8-16       | Kidney stone                      | Not Related       | Resolved   |
| 9  | Cleveland   | 11569-13 | 6/14/16  | Week 8-16       | Loss of Hearing in Right Ear      | Possibly Related  | Unresolved |
| 10 | Cleveland   | 11569-17 | 7/18/17  | Week 16-24      | Foot Abscess                      | Not Related       | Resolved   |
| 11 | Cleveland   | 11569-20 | 12/15/17 | Week 0-4        | Rash-discontinuation of Rifabutin | Related           | Resolved   |
| 12 | Cleveland   | 11569-24 | 9/21/18  | Week 0-4        | yeast infection                   | Possibly Related  |            |
| 13 | Cleveland   | 11569-24 | 11/28/18 | Week 8-16       | increase in hair loss             | Not Related       | Unresolved |
| 14 | Cleveland   | 11569-25 | 9/21/18  | Week 0-4        | joint pain and achiness           | Related           | Unresolved |
| 15 | Cincinnati  | 11570-5  | 12/10/14 | Week 0-4        | intermittent Loose stool          | Related           | Resolved   |
| 16 | Cincinnati  | 11570-5  | 12/16/14 | Week 0-4        | Intermittent loss of appetite     | Related           | Resolved   |
| 17 | Cincinnati  | 11570-5  | 12/19/14 | Week 0-4        | Intermittent weakness             | Related           | Resolved   |
| 18 | Cincinnati  | 11570-5  | 2/1/15   | Week 8-16       | Intermittent Sick on stomach      | Related           | Resolved   |
| 19 | Cincinnati  | 11570-5  | 2/9/15   | Week 8-16       | Intermittent Tiredness            | Related           | Resolved   |
| 20 | Cincinnati  | 11570-9  | 4/22/15  | Week 0-4        | Insomnia                          | Related           | Resolved   |
| 21 | Cincinnati  | 11570-9  | 7/22/15  | Week 8-16       | Joint Stiffness                   | Related           | Resolved   |
| 22 | Cincinnati  | 11570-9  | 9/2/15   | Week 16-24      | Severe Squamous Dysplasia         | Not Related       | Resolved   |
| 23 | Cincinnati  | 11570-10 | 3/18/15  | before baseline | Glucose labs out of range         | Not Related       | Unresolved |
| 24 | Cincinnati  | 11570-13 | 8/9/15   | Week 0-4        | Nausea & Diarrhea                 | Related           | Resolved   |
| 25 | Cincinnati  | 11570-13 | 9/10/15  | Week 4-8        | Intermittent Pruritus             | Related           | Resolved   |
| 26 | Cincinnati  | 11570-13 | 10/9/15  | Week 8-16       | Chills                            | Not Related       | Resolved   |
| 27 | Cincinnati  | 11570-13 | 1/21/16  | Week 24+        | Shoulder Pain                     | Not Related       | Resolved   |
| 28 | Cincinnati  | 11570-16 | 10/11/15 | Week 0-4        | Tiredness                         | Related           | Resolved   |
| 29 | Cincinnati  | 11570-16 | 3/10/16  | Week 24+        | Bronchitis                        | Not Related       | Resolved   |
| 30 | Cincinnati  | 11570-18 | 2/11/16  | Week 0-4        | Hard to swallow                   | Related           | Resolved   |
| 31 | Cincinnati  | 11570-18 | 4/7/16   | Week 8-16       | Elevated Glucose                  | Not Related       | Unresolved |

*Online supplements are not copyedited prior to posting and the author(s) take full responsibility for the accuracy of all data.*



|    |            |          |          |            |                            |                  |            |
|----|------------|----------|----------|------------|----------------------------|------------------|------------|
| 32 | Cincinnati | 11570-20 | 8/14/16  | Week 4-8   | Syncope                    | Possibly Related | Resolved   |
| 33 | Cincinnati | 11570-20 | 8/14/16  | Week 4-8   | leukopenia                 | Possibly Related | Resolved   |
| 34 | Cincinnati | 11570-20 | 8/14/16  | Week 4-8   | Leukopenia                 | Possibly Related | Resolved   |
| 35 | Cincinnati | 11570-22 | 2/27/17  | Week 4-8   | Elevated Glucose           | Not Related      | Resolved   |
| 36 | Cincinnati | 11570-22 | 2/5/17   | Week 0-4   | Fatigue                    | Not Related      | Resolved   |
| 37 | Cincinnati | 11570-22 | 2/7/17   | Week 0-4   | confusion                  | Not Related      | Resolved   |
| 38 | Cincinnati | 11570-22 | 2/9/17   | Week 0-4   | depression                 | Not Related      | Resolved   |
| 39 | Cincinnati | 11570-24 | 11/27/17 | Week 16-24 | Elevated Glucose           | Not Related      | Unresolved |
| 40 | Cincinnati | 11570-27 | 7/26/18  | Week 8-16  | Worsening Glucose          | Not Related      | Unresolved |
| 41 | Cincinnati | 11570-28 | 6/26/18  | Week 0-4   | diarrhea/loose stool       | Related          | Resolved   |
| 42 | Cincinnati | 11570-28 | 6/28/18  | Week 0-4   | Urine Color change         | Related          | Resolved   |
| 43 | Cincinnati | 11570-28 | 7/1/18   | Week 0-4   | Tiredness/Fatigue          | Possibly Related |            |
| 44 | Cincinnati | 11570-28 | 7/3/18   | Week 0-4   | Floater/Blurry Vision      | Possibly Related | Resolved   |
| 45 | Vanderbilt | 11571-4  | 1/15/15  | Week 4-8   | WBC Low                    | Related          | Resolved   |
| 46 | Vanderbilt | 11571-4  | 1/18/15  | Week 8-16  | Shingles                   | Possibly Related | Resolved   |
| 47 | Vanderbilt | 11571-4  | 1/27/15  | Week 8-16  | Nausea, Vomiting, Diarrhea | Possibly Related | Resolved   |
| 48 | Vanderbilt | 11571-5  | 12/4/14  | Week 0-4   | Sinus blockage             | Not Related      | Resolved   |
| 49 | Vanderbilt | 11571-5  | 12/5/14  | Week 0-4   | Eyes red & draining        | Not Related      | Resolved   |
| 50 | Vanderbilt | 11571-7  | 3/12/15  | Week 8-16  | elevated glucose           | Possibly Related | Resolved   |
| 51 | Vanderbilt | 11571-8  | 3/25/15  | Week 4-8   | Shingles                   | Possibly Related | Resolved   |
| 52 | Vanderbilt | 11571-14 | 9/8/15   | Week 4-8   | elevated LFTs              | Possibly Related | Resolved   |
| 53 | Vanderbilt | 11571-14 | 9/8/15   | Week 4-8   | hypoglycemia               | Possibly Related | Resolved   |
| 54 | Vanderbilt | 11571-19 | 7/5/16   | Week 8-16  | elevated glucose           | Possibly Related | Resolved   |
| 55 | Vanderbilt | 11571-20 | 5/4/16   | Week 0-4   | flu-like symptoms          | Related          | Resolved   |
| 56 | Vanderbilt | 11571-24 | 12/28/16 | Week 4-8   | Dehydration                | Possibly Related | Resolved   |
| 57 | Vanderbilt | 11571-24 | 12/28/16 | Week 4-8   | Hospitalization            | Not Related      | Resolved   |
| 58 | Vanderbilt | 11571-26 | 6/3/17   | Week 8-16  | SOB                        | Related          | Resolved   |
| 59 | Vanderbilt | 11571-26 | 6/3/17   | Week 8-16  | Anxiety                    | Related          | Resolved   |
| 60 | Vanderbilt | 11571-28 | 7/17/17  | Week 0-4   | Diarrhea                   | Related          | Resolved   |
| 61 | Vanderbilt | 11571-28 | 7/24/17  | Week 0-4   | Low WBC                    | Related          | Resolved   |
| 62 | Vanderbilt | 11571-29 | 9/26/17  | Week 8-16  | Sinus Infection            | Not Related      | Resolved   |
| 63 | Vanderbilt | 11571-30 | 11/2/17  | Week 8-16  | hypoglycemia               | Possibly Related | Resolved   |
| 64 | Vanderbilt | 11571-35 | 7/14/18  | Week 0-4   | Joint pain                 | Related          | Resolved   |
| 65 | Vanderbilt | 11571-39 | 12/14/18 | Week 0-4   | Pneumonia DX               | Possibly Related | Resolved   |

*Online supplements are not copyedited prior to posting and the author(s) take full responsibility for the accuracy of all data.*



# CHEST™ Online Supplement

|    |     |         |         |            |                                                       |                  |            |
|----|-----|---------|---------|------------|-------------------------------------------------------|------------------|------------|
| 66 | AMC | 33016-2 | 1/28/18 | Week 0-4   | nausea, vomiting, diarrhea                            | Related          | Resolved   |
| 67 | AMC | 33016-2 | 1/28/18 | Week 0-4   | fever, chills                                         | Related          | Resolved   |
| 68 | AMC | 33016-2 | 1/29/18 | Week 0-4   | Hypotension                                           | Related          | Resolved   |
| 69 | AMC | 33016-3 | 2/1/18  | Week 0-4   | Diarrhea, loss of appetite,                           | Possibly Related | Resolved   |
| 70 | AMC | 33016-3 | 2/1/18  | Week 0-4   | muscle/flank/joint pain                               | Possibly Related | Resolved   |
| 71 | AMC | 33016-3 | 2/1/18  | Week 0-4   | cough, wheeze, congestion                             | Possibly Related | Resolved   |
| 72 | OSU | 33931-1 | 7/29/17 | Week 0-4   | Nauseated, Vomiting & Diarrhea                        | Related          | Resolved   |
| 73 | OSU | 33931-1 | 7/29/17 | Week 0-4   | Anxiety, Insomnia                                     | Possibly Related | Resolved   |
| 74 | OSU | 33931-1 | 7/28/17 | Week 0-4   | Yeast Infection, Urine Urgency, Fever,<br>Joint Aches | Possibly Related | Resolved   |
| 75 | OSU | 33931-1 | 12/1/17 | Week 16-24 | Right Upper Quadant Pain                              | Possibly Related | Unresolved |
